# Supplementary material for: Past and Future Influenza Vaccine Uptake Motivation: A Cross-Sectional Analysis among Italian Health Sciences Students
Source: MDPI journal article supplement (doi:10.3390/vaccines11040717), 2023-03-23
Supplement: s1 [file s1]

**Supplementary Table S1.** Number of health sciences students according to degree programme and University center.

|                                                                    | Ancona | Bari | L'Aquila | Messina | Naples | Palermo | Parma | Pavia | Perugia | Rome | Salerno | Siena | Turin | Udine |
|--------------------------------------------------------------------|--------|------|----------|---------|--------|---------|-------|-------|---------|------|---------|-------|-------|-------|
| Medicine                                                           | 47     | 62   | 31       | 102     | 125    | 79      | 55    | 174   | 49      | 59   | 167     | 139   | 105   | 25    |
| Healthcare Assistance                                              | 0      | 10   | 0        | 0       | 0      | 2       | 0     | 0     | 0       | 0    | 0       | 0     | 0     | 0     |
| Pharmacy                                                           | 0      | 1    | 1        | 17      | 21     | 1       | 0     | 23    | 95      | 0    | 0       | 0     | 0     | 0     |
| Dietetics                                                          | 8      | 11   | 5        | 0       | 1      | 0       | 0     | 1     | 0       | 4    | 0       | 0     | 11    | 0     |
| Professional Education                                             | 0      | 10   | 0        | 0       | 0      | 0       | 0     | 0     | 0       | 0    | 0       | 0     | 9     | 2     |
| Physiotherapy                                                      | 0      | 11   | 0        | 0       | 11     | 2       | 7     | 4     | 37      | 5    | 3       | 0     | 39    | 1     |
| Dental Hygiene                                                     | 15     | 1    | 0        | 0       | 5      | 0       | 0     | 2     | 0       | 6    | 0       | 0     | 1     | 0     |
| Pediatric Nursing                                                  | 0      | 1    | 1        | 0       | 0      | 0       | 0     | 0     | 1       | 0    | 0       | 0     | 0     | 0     |
| Nursing                                                            | 35     | 25   | 9        | 0       | 52     | 72      | 30    | 453   | 90      | 52   | 13      | 7     | 71    | 7     |
| Speech therapy                                                     | 0      | 2    | 0        | 5       | 9      | 1       | 3     | 0     | 18      | 4    | 0       | 1     | 25    | 0     |
| Dentistry                                                          | 2      | 2    | 1        | 8       | 14     | 2       | 5     | 24    | 0       | 0    | 1       | 9     | 22    | 0     |
| Orthoptics                                                         | 2      | 3    | 1        | 4       | 4      | 1       | 0     | 1     | 0       | 5    | 0       | 1     | 7     | 0     |
| Obstetrics                                                         | 0      | 8    | 3        | 4       | 34     | 1       | 8     | 5     | 20      | 2    | 0       | 22    | 18    | 0     |
| Podiatry                                                           | 0      | 0    | 0        | 0       | 0      | 0       | 0     | 0     | 0       | 2    | 0       | 0     | 0     | 0     |
| Rehabilitation Sciences for Healthcare Professionals               | 0      | 0    | 1        | 0       | 0      | 1       | 0     | 0     | 14      | 0    | 0       | 2     | 0     | 0     |
| Healthcare Sciences Professions Prevention                         | 9      | 6    | 1        | 0       | 9      | 1       | 4     | 2     | 20      | 1    | 0       | 0     | 1     | 0     |
| Healthcare Sciences Professions Technical Assistance               | 0      | 3    | 0        | 0       | 3      | 1       | 0     | 1     | 0       | 0    | 1       | 1     | 3     | 0     |
| Healthcare Professions Sciences Technical Diagnostic               | 1      | 4    | 3        | 3       | 0      | 1       | 8     | 4     | 12      | 4    | 0       | 0     | 19    | 1     |
| Sport Sciences                                                     | 0      | 8    | 1        | 0       | 0      | 3       | 6     | 11    | 7       | 9    | 8       | 1     | 0     | 1     |
| Audioprosthetic Techniques                                         | 0      | 0    | 0        | 0       | 0      | 0       | 0     | 0     | 2       | 0    | 0       | 0     | 0     | 0     |
| Cardiocirculatory Physiopathology and Cardiac Perfusion Techniques | 1      | 1    | 0        | 0       | 0      | 0       | 0     | 2     | 0       | 2    | 0       | 0     | 0     | 0     |
| Biomedical Laboratory Techniques                                   | 0      | 0    | 0        | 0       | 1      | 1       | 0     | 0     | 0       | 0    | 1       | 0     | 0     | 0     |

[illegible]
